# Supplementary material
Source: PubMed Central journal article supplement (PMC4248764)
Supplement: CVI.00469-14_zcd999095095so1.pdf [file CVI.00469-14_zcd999095095so1.pdf]

## 1 SUPPLEMENTAL INFORMATION

2

### 3 METHODS

4 **Real-Time Quantitative TaqMan RT-PCR. Peripheral blood mononuclear cells (PBMC)** were  
5 plated into 24-well round bottom plates and cultured in media with and without 1.25 µg/mL  
6 recombinant Protective Antigen (rPA). The cells were incubated at 37°C/5% CO<sub>2</sub> for 24 h (Group 1-5)  
7 and 64 h (Group 6-12).. The cell suspension was centrifuged and the cell pellet was resuspended in  
8 TRIZol Reagent (Invitrogen, Carlsbad, CA) and stored frozen until processing according to the  
9 manufacturer's instructions with the addition of PhaseLock Gel (5 Prime 3 Prime, Inc., Boulder, CO).  
10 The RNA pellet was dissolved in RNA Storage Solution (Ambion, Austin, TX). RNA was quantitated  
11 spectrophotometrically based on an absorbance at 260 nm of one equal to an RNA concentration of 40  
12 µg/mL. Total RNA (0.65 µg) was reverse transcribed into cDNA using SuperScript III<sup>TM</sup> First-Strand  
13 Synthesis System for RT-PCR (Life Technologies, Gaithersburg, MD) according to the manufacturer's  
14 instructions.

15 Cytokine mRNA levels were measured by real-time quantitative RT-PCR using a PE Applied  
16 Biosystems Prism 7700 sequence detection instrument. NHP primer and probe sets for IFN-γ, IL-2, IL-  
17 4, IL-6, IL-1β, and TNF-α were designed using the Assay-by-Design service of Applied Biosystems  
18 (Applied Biosystems, Foster City, CA). Gene accession numbers are in Table S1 and NHP primer probe  
19 sequences are in Table S2. Assays were performed in duplicate and averaged. No-template controls and  
20 reverse transcriptase minus controls were negative for amplification.

21 Threshold cycle (*C<sub>t</sub>*), which correlates inversely with the target mRNA levels, was measured as the  
22 cycle number at which the reporter fluorescent emission increased above a threshold level. The  
23 comparative *C<sub>t</sub>* method was used to determine relative quantitation. *C<sub>t</sub>* values for cytokine amplification  
24 were normalized by subtracting the *C<sub>t</sub>* values for 18S rRNA using the equation:  $C_{t(\text{cytokine})} - C_{t(18S \text{ rRNA})} =$   
25  $\Delta C_t$ . The cytokine stimulated  $\Delta C_t$  was subtracted from the unstimulated  $\Delta C_t$  to calculate the fold change  
26 in cytokine expression:  $\Delta C_{t(\text{stimulated})} - \Delta C_{t(\text{unstimulated})} = \Delta \Delta C_t$ . Fold increases in cytokine expression were

27 calculated by the following equation according to ABI User Bulletin #2:  $2^{-\Delta\Delta C_t}$  = fold change in  
28 expression.

29 **Cytokine Secretion Analyses.** Secreted cytokine levels in unstimulated and rPA stimulated PBMC  
30 were assayed in duplicate using commercially available ELISA kits (Table S3) according to the  
31 manufacturer's instructions. The threshold levels of detection were 15.6 pg/mL IFN- $\gamma$ , 31.2 pg/mL IL-2,  
32 7.8 pg/mL IL-4, 3.12 pg/mL IL-6, 3.9 pg/mL IL-1 $\beta$ , and 7.8 pg/mL TNF- $\alpha$ . Cytokine levels below the  
33 limit of detection were set to one-half the minimum detectable level for the assay. Cytokine levels above  
34 the limit of detection were repeated at a higher dilution if sufficient sample was available. If not, values  
35 were then set at the maximum limit of detection for each assay, 1000 pg/mL IFN- $\gamma$ , 2000 pg/mL IL-2,  
36 500 pg/mL IL-4, 300 pg/mL IL-6, 250 pg/mL IL-1 $\beta$ , and 500 pg/mL TNF- $\alpha$ . The stimulated to  
37 unstimulated ratio for each cytokine was calculated.

38 **Lethal Toxin Neutralization Activity (TNA) Assay:** TNA assays were done according to Li et al.  
39 (1) using human reference standard AVR801 (2). Reportable values were the reciprocal serum sample  
40 dilution effecting 50% neutralization of anthrax lethal toxin (ED50). Endpoints were calculated using  
41 SAS® version 9.0 (SAS Institute Inc. Cary, NC USA). The LOD and LLOQ were ED50 of 11 and 36  
42 respectively (1). ED50 values <LOD were replaced with ½ the LOD for the statistical analyses.

43 **Anti-PA IgG ELISA:** Immulon® 2 HB microtiter plates (Thermo Labsystems, Franklin, MA) were  
44 coated with rPA (2  $\mu$ g/mL) in phosphate buffered saline (PBS) pH 7.4 (Life Technologies, Gaithersburg,  
45 MD). Plates were washed 3x with PBS containing, 0.1% Tween 20. Test sera were added to wells pre-  
46 loaded with 100  $\mu$ l of PBS containing 5% skim milk (wt/vol) and 0.5% Tween-20 (vol/vol), pH 7.4,  
47 mixed on the plate and serially transferred to make an 8-point dilution series with a 100  $\mu$ l/well. After  
48 washing, bound anti-PA IgG was detected with horseradish peroxidase-conjugated goat anti-monkey  
49 IgG (Research Diagnostics, Inc, Flanders, NJ) and color developed with ABTS substrate (Kirkegaard  
50 and Perry Laboratories, Gaithersburg, MD). Data were analyzed using a four-parameter logistic-log  
51 curve-fitting model with ELISA for Windows software (Version 2.15). Reportable values of anti-PA  
52 IgG for rhesus macaques were in  $\mu$ g/mL using a calibration factor of 171.9  $\mu$ g/mL for reference serum

53 AVR731. The lower limits of detection (LOD) and quantification (LLOQ) were 0.4 and 2.3 g/mL anti-  
54 PA IgG respectively (3). Concentration values <LOD were replaced with ½ the LOD for the statistical  
55 analyses.

56 **Anti-PA IgG Avidity:** Serum samples with  $\geq 5$   $\mu\text{g/mL}$  total anti-PA IgG were evaluated for avidity,  
57 an indirect assessment of polyclonal antibody affinity, immune response maturation and a surrogate for  
58 memory B cell persistence (4). The avidity indices (AI) were determined by anti-PA IgG elution from  
59 immobilized rPA with ammonium thiocyanate ( $\text{NH}_4\text{SCN}$ ; 0.078 - 5M) (Sigma). A 4-PL dissociation  
60 curve was generated for percent maximum detected signal versus  $\text{NH}_4\text{SCN}$  concentration and the  
61 avidity index (AI) reported as the concentration of  $\text{NH}_4\text{SCN}$  required to elute 50% of bound anti-PA  
62 IgG.

63 **Detection of IFN- $\gamma$  and IL-4 Secreting Cells:** PBMC were prepared as described previously (4).  
64 IFN- $\gamma$  and IL-4 producing cells were enumerated by ELISpot assay following *in vitro* re-stimulation  
65 with 1  $\mu\text{g/mL}$  rPA (24 h for IFN- $\gamma$  assays and 36 h for IL-4 assays). Staphylococcal enterotoxin B at 2  
66  $\mu\text{g/well}$  (Toxin Technology, Sarasota, FL) was used as a positive control. Un-stimulated cultures served  
67 as negative controls. The frequency of IFN- $\gamma$ + or IL-4+ T cells specific for rPA was calculated by  
68 subtracting the average number of spot forming units (SFU) in unstimulated negative control triplicate  
69 wells from the average number of SFU in rPA stimulated triplicate wells and expressed as rPA-specific  
70 IFN- $\gamma$  or IL-4 SFU/ $10^6$  PBMC.

71 **Lymphocyte Stimulation Indices:** PBMC were plated in quadruplicate into 96-well round bottom  
72 microtiter plates containing 200  $\mu\text{l}$  of either media alone or media containing 1.25  $\mu\text{g/mL}$  rPA. The  
73 positive control was phytohemagglutinin (10  $\mu\text{g/mL}$ ). Cells were incubated for 96 h at 37°C, 5%  $\text{CO}_2$ .  
74 Cultures were then pulsed with 20  $\mu\text{L}$  of a 50  $\mu\text{Ci/mL}$   $^3\text{[H]}$ -thymidine solution and incubated for 18 h at  
75 37°C, 5%  $\text{CO}_2$ . Cells were harvested onto filter discs (Fisher, Pittsburgh, PA) and counted on a Packard  
76 scintillation counter (Packard, Meriden, CT). Stimulation indices (SI) were calculated as the quotient of  
77 [mean counts per minute of stimulated cells  $\div$  mean counts per minute of unstimulated cells].

78 Anti-PA IgG Specific B Cells: Antigen specific B cells were enumerated by ELISpot assay as described in detail  
79 elsewhere (5 - 7) and modified for the proliferation and detection of rhesus macaque IgG secreting cells.  
80 Macaque PBMC were plated in a 24-well plates at  $5 \times 10^5$  cells/well in R-10 medium supplemented with a  
81 mix of polyclonal mitogens: 1/10,000 Pokeweed Mitogen extract, 6  $\mu\text{g}/\text{ml}$  CpG ODN-2006, and 1/10,000  
82 Staphylococcus Aureus, Cowan strain (SAC) (Sigma). Cells were cultured for 6 days at  $37^\circ\text{C}$ , 6-8%  $\text{CO}_2$ . For  
83 ELISpot detection, 96-well filter plates (Millipore, MAHA N4510) were coated overnight with rPA at 1  $\mu\text{g}/\text{ml}$ . KLH  
84 (2.5  $\mu\text{g}/\text{ml}$ ) was used as an antigen control. Total and rPA specific IgG-secreting cells were detected using 10  
85  $\mu\text{g}/\text{ml}$  goat anti-monkey Ig (Accurate Chem. Co). Data were represented as the frequency (percentage) of rPA-  
86 specific anti-PA secreting cells versus the total  $\text{IgG}^+$  secreting cells in PBMC. The lower limit of detection  
87 (LOD) was 0.002 antigen-specific  $\text{IgG}^+$  secreting cells per  $10^6$  PBMC.

88 **Primary data set construction, variable masking, transformation and standardization.** Data  
89 were from control and vaccinated animals that completed the study (Table 1). Except for vaccine dose  
90 and the interval between first vaccination and aerosol challenge ('duration') the primary data set was  
91 constructed with each variable corresponding to an assay with measurements approximately every four  
92 weeks. Values of TNA (1) and anti-PA IgG (3) that were lower than their lower limit of detection (TNA  
93  $\text{LOD} = 11$ ; anti-PA IgG  $\text{LOD} = 0.4 \mu\text{g}/\text{mL}$ ) were replaced with half of their LOD values. Data from  
94 assays without an established LOD were transformed by scaling followed by addition of 1. The scaling  
95 was performed by multiplying each value within a variable with the same number so that the lowest  
96 non-zero value within the variable became 3. The addition of 1 prevents zeros from being lost during log  
97 transformation (8). For the non-zero data points that have values below 3, log transformation with  
98 addition of 1 significantly change the positions of these data points compared to log transformation  
99 without addition of 1. After making the smallest non-zero value of each variable be 3, addition of 1  
100 followed by log transformation still preserves the positions of these low values compared to log  
101 transformation without addition of 1. For assessment of the relative contributions of humoral and  
102 cellular immune responses, ratio variables were generated by dividing Th2 response related variables by  
103 Th1 response related variables. The ratio variables were the ratio of IL-4 mRNA to IFN- $\gamma$  mRNA

104 (r\_il4IFNm), the ratio of secreted IL-4 protein to secreted IFN- $\gamma$  protein (R\_IL4IFNe), and the ratio of  
105 the frequency of IL-4-secreting cells to that of IFN- $\gamma$ -secreting cells (R\_IL4IFNeli). All the assay  
106 variables were then log<sub>10</sub> transformed and standardized with a mean of 0 and a standard deviation of 1.

107 **Data set re-construction.** The data set was re-constructed from the primary data set by converting  
108 the measurement at each time point into an individual variable. The measurements at different study  
109 time points were then treated as independent variables (e.g. anti-PA IgG at month 6 is one variable  
110 IgG\_6, and anti-PA IgG at month 7 is a separate variable, IgG\_7). Except for the last available time  
111 point prior to *B. anthracis* spore aerosol challenge, all time points after month 12 were excluded due to  
112 the fact that further time points were unavailable for animals challenged at month 12. The month 7 time  
113 point, which is 1 month after the priming series, was designated ‘Peak’, and the last available sample  
114 time point prior to challenge was designated ‘Last’ for all NHP. The final assay variables (n=80) used in  
115 the analysis are listed in Table 2.

116 **Missing value imputation.** To impute missing values, Proc MI (SAS<sup>®</sup> version 9.3, SAS Institute  
117 Inc. Cary, NC USA) with the expectation–maximization (EM) algorithm was used to generate 20  
118 imputed data sets. Due to the presence of multicollinearity among some variables, Proc MI was  
119 performed separately at different study time points. At each study time point, mRNA variables,  
120 cytokine-ELISA variables and ratio variables were imputed separately. Vaccine dose was not included  
121 for imputations, because the collinearity of dose with other variables varies across different time points.  
122 Variables that made the EM algorithm not converge were excluded. These variables were anti-PA IgG1,  
123 IgG2, IgG3 and IgG4, and anti-PA IgG-specific B cells. In addition, variables at some time points with  
124 identical observed values across all the animals were excluded. The time points used for the variables  
125 were included in Table 2. In total, 80 immunological variables together with vaccine dose and duration  
126 (n = 82) were included in the 20 imputed data sets for selecting variables (Table 2). Table 3 summarizes  
127 the three imputations performed at each time point. All variables were standardized with a mean of 0  
128 and a variance of 1 prior to evaluating for COP.

129 **Variable selections by LASSO and elastic net penalized logistic regressions.** Multiple methods  
130 were implemented in various software packages for the purpose of identifying correlations. Each method  
131 or package has various strengths and weaknesses. In order to have the highest confidence that the best  
132 correlates are identified, we selected software packages that employ two statistical approaches and differ  
133 in their optimization algorithms and penalty parameter tuning. Optimal or parsimonious LASSO and  
134 elastic net variable selections were performed in three R packages Glmnet (9), Elasticnet (10), Pensim  
135 (11), and the C++ software package BBR (Bayesian Binary Regression) (12). Penalized logistic  
136 regression is to maximizing the penalized log likelihood  $l(\beta)_{\text{penalized}} = l(\beta) - \lambda_1(|\hat{\beta}_1| + \dots + |\hat{\beta}_p|) - \lambda_2(\hat{\beta}_1^2 +$   
137  $\dots + \hat{\beta}_p^2)$ , where  $l(\beta)$  is the log likelihood,  $\lambda_1$  is a LASSO penalty parameter;  $\lambda_2$  is a Ridge penalty  
138 parameter; and  $\hat{\beta}_1, \dots, \hat{\beta}_p$  are the parameter estimates for variables  $X_1, \dots, X_p$  respectively.  $\lambda_2$  is equal to  
139 0 in LASSO penalized logistic regression;  $\lambda_1$  is equal to 0 in Ridge penalized logistic regression; and  
140 neither is 0 in elastic net penalized logistic regression. LASSO may undergo too stringent shrinkage and  
141 thus ignore important predictors, while elastic net has the grouping effect, selecting important predictors  
142 even if they are correlated. Elastic net may however select too many predictors, resulting in overfitting  
143 in the prediction model. Among the four packages, one dimensional or two dimensional penalty  
144 parameter tuning was done by repeated (60 times) 10-fold cross-validation, where the data were  
145 randomly and evenly split into 10 subsets and cross-validation was performed 10 times with each subset  
146 being used as the validation data set once for testing the model and the remaining 9 subsets as the  
147 training data set for the model. The 10 sets of results generated were then summarized to produce a  
148 single estimation of the prediction error. When feasible based on the software package features, both  
149 LASSO and elastic net approaches were used and two sets of variables were selected; an optimal set and  
150 a parsimonious set. The optimal set of variables was selected when the cross validation error was the  
151 minimum or the cross-validated likelihood was the maximum, thus minimizing prediction error. The  
152 parsimonious sets of variables were selected by applying the “1-standard error rule” (13), choosing the  
153 variables when the cross validation error reached the sum of the minimum cross validation error and one  
154 standard error, thus minimizing overfitting. BBR only performs LASSO selection by applying the

155 Laplace prior to the parameter space, while only the optimal variable set can be obtained from Pensim  
156 because its cross-validation is based on maximum likelihood and the “1-standard error rule” can not be  
157 applied.

158 With each of the twenty imputed data sets, variable selection was accomplished using each  
159 permutation of LASSO and elastic net with software package and optimal or parsimonious set. In order  
160 to summarize all the selected variables from twenty imputed data sets into a single variable set, rank,  
161 frequency and score were generated. Within each set of selected variables from each imputed data set,  
162 the variables were ordered from high to low according to their regression coefficients and were then  
163 assigned numbers in descending order from 82 with a difference of 1 between neighboring variables.  
164 Rank was obtained by adding these assigned numbers across the imputed data sets where the variable  
165 was selected among the twenty imputed data sets. Frequency indicates the number of times each variable  
166 was selected out of the 20 imputed data sets. Score is the product of rank and frequency. Variables with  
167 a frequency of  $\geq 10$  were chosen for further analyses (Tables S5-S10) (14, 15).

168 **Evaluation of survival prediction models with selected sets of variables.** Collinearity or  
169 multicollinearity, arising from the correlations among variables in the model, can generate large  
170 standard errors in the coefficient estimates in the model. When a sample set has a different collinearity  
171 or multicollinearity pattern from that used for building the model the cross-sample predictions are not  
172 reliable (16). Collinearity or multicollinearity diagnoses were performed by Proc REG in SAS<sup>®</sup> version  
173 9.3, with cutoff values of 0.4 for tolerance, 2.5 for variance inflation factor (VIF) and 10 for condition  
174 number (17, 18).

175 For variable sets that were diagnosed as having multicollinearity, PCLR were performed by doing  
176 PCA using Prcomp in R followed by logistic regression using glm.fit in R with models  $\ln[\hat{\pi}/(1-\hat{\pi})] = \hat{\beta}_0$   
177  $+ \hat{\beta}_1 Z_1 + \dots + \hat{\beta}_p Z_p$ , where  $\hat{\pi}$  was the estimated probability of survival given scores  $Z_1, \dots, Z_p$ , the  
178 centered values multiplied by the eigenvectors generated from PCA for principal components 1...p  
179 respectively,  $\hat{\beta}_0$  was the estimated intercept of the PCLR model, and  $\hat{\beta}_1, \dots, \hat{\beta}_p$  were the parameter  
180 estimates for scores  $Z_1, \dots, Z_p$  respectively. For variable sets that did not have collinearity or

181 multicollinearity, logistic regressions were performed by glm.fit in R. The models were  $\ln[\hat{\pi}/(1-\hat{\pi})] = \hat{\beta}_0$   
182  $+ \hat{\beta}_1 X_1 + \dots + \hat{\beta}_p X_p$ , where  $\hat{\pi}$  was the estimated probability of survival given variables  $X_1, \dots, X_p$ ,  
183  $\hat{\beta}_0$  was the estimated intercept of the logistic regression model, and  $\hat{\beta}_1, \dots, \hat{\beta}_p$  were the parameter  
184 estimates for variables  $X_1, \dots, X_p$  respectively.

185 AUC was generated for each regression model. AUC was the probability for ranking a randomly  
186 chosen survivor NHP higher than a randomly chosen non-survivor NHP. The higher the AUC is, the  
187 higher the discriminative accuracy of the model. An AUC greater than 0.90 indicated high accuracy;  
188 AUC of 0.80–0.90 indicated good accuracy; 0.70–0.80 moderate accuracy and 0.50–0.70 indicated low  
189 accuracy approaching random probability (19, 20). To compare AUCs between models, paired  
190 permutation tests in R were performed (21, 22), with a Bonferroni-corrected significance level of 0.0025  
191 for multiple comparisons.



## SUPPLEMENTAL REFERENCES

1. **Li H, Soroka SD, Taylor TH Jr, Stamey KL, Stinson KW, Freeman AE, Abramson DR, Desai R, Cronin LX, Oxford JW, Caba J, Pleatman C, Pathak S, Schmidt DS, Semenova VA, Martin SK, Wilkins PP, Quinn CP.** 2008. Standardized, mathematical model-based and validated in vitro analysis of anthrax lethal toxin neutralization. *J. Immunol. Methods.* **333**:89-106.
2. **Semenova, V.A., E. Steward-Clark, K.L. Stamey, T.H. Taylor Jr., D.S. Schmidt, S.K. Martin, N. Marano N, and C.P. Quinn.** 2004. Mass value assignment of total and subclass immunoglobulin G in a human standard anthrax reference serum. *Clin. Diagn. Lab. Immunol.* **11**:919-923.
3. **Longworth, E., R. Borrow, D. Goldblatt, P. Balmer, M. Dawson, N. Andrews, E. Miller, and K. Cartwright.** 2002. Avidity maturation following vaccination with a meningococcal recombinant hexavalent PorA OMV vaccine in UK infants. *Vaccine.* **20**:2592-2596.
4. **Pahar, B., J. Li, T. Rourke, C.J. Miller, and M.B. McChesney.** 2003. Detection of antigen-specific T cell interferon gamma expression by ELISPOT and cytokine flow cytometry assays in rhesus macaques. *J. Immunol. Methods.* **282**:103-15.
5. **Crotty, S., R.D. Aubert, J. Glidewell, and R. Ahmed.** 2004. Tracking human antigen-specific memory B cells: a sensitive and generalized ELISPOT system. *J. Immunol. Methods.* **286**:111-122.
6. **Crotty S, P. Felgner, H. Davies, J. Glidewell, L. Villarreal, and R. Ahmed.** 2003. Cutting edge: long-term B cell memory in humans after smallpox vaccination. *J. Immunol.* **171**:4969–73.

7. **Quinn CP, Sabourin CL, Niemuth NA, Li H, Semenova VA, Rudge TL, Mayfield HJ, Schiffer J, Mittler RS, Ibegbu CC, Wrammert J, Ahmed R, Brys AM, Hunt RE, Levesque D, Estep JE, Barnewall RE, Robinson DM, Plikaytis BD, Marano N.** 2012. A Three-Dose Intramuscular Injection Schedule of Anthrax Vaccine Adsorbed Generates Sustained Humoral and Cellular Immune Responses to Protective Antigen and Provides Long-Term Protection against Inhalation Anthrax in Rhesus Macaques. *Clin. Vaccine Immunol.* **19**:1730-1745.
8. **Osborne, J.** 2002. Notes on the use of data transformations. *Practical Assessment, Res. Eval.* **8**.  
<http://pareonline.net/getvn.asp?v=8&n=6>
9. **Friedman J, Hastie T, Tibshirani R.** 2010. Regularization Paths for Generalized Linear Models via Coordinate Descent. *J. Stat. Softw.* **33**:1-22.
10. **Zou H, Hastie T.** 2005. Regularization and variable selection via the elastic net. *J. Roy. Stat. Soc. B.* **67**:301-320.
11. **Waldron L, Pintilie M, Tsao MS, Shepherd FA, Huttenhower C, Jurisica I.** 2011. Optimized application of penalized regression methods to diverse genomic data. *Bioinformatics* **27**:3399-3406.
12. **Genkin A, Lewis DD, Madigan D.** 2007. Large-scale Bayesian logistic regression for text categorization. *Technometrics* **49**:291-304.
13. **Hastie T, Tibshirani R, Friedman J.** 2009. *The Elements of Statistical Learning: Data Mining, Inference, and Prediction.* 2nd ed, Springer-Verlag, New York, NY.

14. **Heymans MW, van Buuren S, Knol DL, van Mechelen W, de Vet HCW.** 2007. Variable selection under multiple imputation using the bootstrap in a prognostic study. *BMC Med. Res. Methodol.* **7**:33.
15. **Austin PC, Tu JV.** 2004. Bootstrap Methods for Developing Predictive Models. *The American Statistician*, **58**:131-137.
16. **Chatterjee S, Hadi AS, Price B** 2000. *Regression Analysis by Example*, 3rd Edition, A Wiley-Interscience Publication, John Wiley and Sons.
17. **Allison, PD.** 1999. *Multiple Regression: A Primer*. Pine Forge Press, Thousand Oaks, CA.
18. **Belsley DA, Kuh K, Welsch RE.** 1980. *Regression diagnostics: Identifying influential data and sources of collinearity*, John Wiley & Sons, New York, NY.
19. **Swets, JA.** 1988. Measuring the accuracy of diagnostic systems. *Science* **240**:1285–1293.
20. **Wigton, RS, Connor, JL, Centor, RM.** 1986. Transportability of a decision rule for the diagnosis of streptococcal pharyngitis. *Arch. Intern. Med.* **146**:81-83.
21. **Venkatraman ES.** 2000. A permutation test to compare receiver operating characteristic curves. *Biometrics* **56**:1134-1138.

22. **Robin X, Turck N, Hainard A, Tiberti N, Lisacek F, Sanchez JC, Müller M.** 2011. pROC:  
an open-source package for R and S+ to analyze and compare ROC curves. *BMC Bioinformatics*  
**12:77.**

## **TABLE LEGENDS**

### **TABLE S1** Gene Accession Numbers

Accession numbers for six cytokine genes that were determined by real-time quantitative TaqMan RT-PCR.

### **TABLE S2** NHP Assay by Design Primer/Probe Sets

Forward and reverse primers and probes were designed for real-time quantitative TaqMan RT-PCR of six cytokine genes.

### **TABLE S3** NHP Assay by Design Primer/Probe Sets

Six ELISA kits were used for detecting six cytokine proteins.

### **TABLE S4** Missing rates (%) for variables

NA not available.

### **TABLE S5** Imputations at each time point

Three sets of imputations were performed at each time point. In each set of imputation, variables were included if there was no multicollinearity present. Some variables were used in more than one set (e.g. TNA), and these variables were retained for analysis from only 1 imputed set.

### **TABLE S6** Introduction of variable selection software packages

Four software packages were used for variable selections, with different languages, optimization algorithms and criteria for tuning penalty parameters.

### **TABLE S7** Summary of optimal variable selections

Optimal variable selections were performed with 7 selection methods. \* p value < 0.05 from Wald Chi-Square test of the parameter estimate;  $\checkmark$  Variables that were selected by all the optimal selection methods.

### **TABLE S8** Variables selected by BBR

Variables were selected by LASSO with C++ package BBR. Parsimonious: Parsimonious variable set. Optimal: Optimal variable set. The selected variables were ordered from high to low by ordering the

regression coefficients from high to low, and were then assigned numbers in descending order from 82 with a difference of 1 between neighboring variables. Rank was obtained by adding these assigned numbers across the imputed data sets where the variable was selected. Frequency indicates the number of times each variable was selected out of the 20 imputed data sets. Score is the product between rank and frequency.

**TABLE S9** Parsimonious sets of variables selected by LASSO and elastic net with Elasticnet package

Parsimonious variables were selected by LASSO or elastic net with the Elasticnet package. The selected variables were ordered from high to low by ordering the regression coefficients from high to low, and were then assigned numbers in descending order from 82 with a difference of 1 between neighboring variables. Rank was obtained by adding these assigned numbers across the imputed data sets where the variable was selected. Frequency indicates the number of times each variable was selected out of the 20 imputed data sets. Score is the product between rank and frequency.

**TABLE S10** Optimal sets of variables selected by LASSO and elastic net with Elasticnet package

Optimal variables were selected by LASSO or elastic net with the Elasticnet package. The selected variables were ordered from high to low by ordering the regression coefficients from high to low, and were then assigned numbers in descending order from 82 with a difference of 1 between neighboring variables. Rank was obtained by adding these assigned numbers across the imputed data sets where the variable was selected. Frequency indicates the number of times each variable was selected out of the 20 imputed data sets. Score is the product between rank and frequency.

**TABLE S11** Optimal sets of variables selected by LASSO and elastic net with Pensim package

Optimal variables were selected by LASSO or elastic net with the Pensim package. The selected variables were ordered from high to low by ordering the regression coefficients from high to low, and were then assigned numbers in descending order from 82 with a difference of 1 between neighboring variables. Rank was obtained by adding these assigned numbers across the imputed data sets where the variable was selected. Frequency indicates the number of times each variable was selected out of the 20 imputed data sets. Score is the product between rank and frequency.

**TABLE S12** Parsimonious sets of variables selected by LASSO and elastic net with Glmnet package

Parsimonious variables were selected by LASSO or elastic net with the Glmnet package. The selected variables were ordered from high to low by ordering the regression coefficients from high to low, and were then assigned numbers in descending order from 82 with a difference of 1 between neighboring variables. Rank was obtained by adding these assigned numbers across the imputed data sets where the variable was selected. Frequency indicates the number of times each variable was selected out of the 20 imputed data sets. Score is the product between rank and frequency.

**TABLE S13** Optimal sets of variables selected by LASSO and elastic net with Glmnet package

Optimal variables were selected by LASSO or elastic net with the Glmnet package. The selected variables were ordered from high to low by ordering the regression coefficients from high to low, and were then assigned numbers in descending order from 82 with a difference of 1 between neighboring variables. Rank was obtained by adding these assigned numbers across the imputed data sets where the variable was selected. Frequency indicates the number of times each variable was selected out of the 20 imputed data sets. Score is the product between rank and frequency.

**TABLE S14** Comparing performance of regression models with parsimonious variable sets

The AUCs of logistic regression and PCLR models were compared with that of the logistic regression model with variables ‘Last’ anti-PA IgG and SI at month 2 by paired permutation tests with the twenty imputed data sets, with a Bonferroni-corrected significance level of 0.0025 for multiple comparisons. \*  $p < 0.0025$ .

**TABLE S1** Gene Accession Numbers

| <b>Gene</b>   | <b>Accession Number</b> |
|---------------|-------------------------|
| IFN- $\gamma$ | L26024                  |
| IL-2          | U19847                  |
| IL-4          | L26027                  |
| IL-6          | L26028                  |
| IL-1 $\beta$  | U19845                  |
| TNF- $\alpha$ | U19850                  |

Accession numbers for six cytokine genes that were determined by real-time quantitative TaqMan RT-PCR.



**TABLE S2** NHP Assay by Design Primer/Probe Sets

| <b>Forward Primer Name</b> | <b>Forward Primer Sequence</b> |
|----------------------------|--------------------------------|
| IFN-gamma-366F             | AAACGGGATGACTTTGAAAAGCT        |
| IL-2-207F                  | ACCAGGATGCTCACATTTAAGTTTT      |
| IL-4-360F                  | AACGGCTCGACAGGAACCT            |
| IL-6-210F                  | CATCCTCGACGGCATCTCA            |
| IL-1-47F                   | GAGCTCGCCAGTGAAATGATG          |
| TNF-232F                   | CCCAAGGACCCCTCTCTAATCAG        |
| <b>Reverse Primer Name</b> | <b>Reverse Primer Sequence</b> |
| IFN-gamma-366R             | GCTTTGCGTTGGACATTTGAG          |
| IL-2-207R                  | CCAGAGGTTTGAGTTCTTCTTCTAGAC    |
| IL-4-360R                  | CTCTGGTTGGCTTCCTTCACA          |
| IL-6-210R                  | TGCTTTCACACATGTTACTCCTGTT      |
| IL-1-47R                   | CATCGACGTCAAAGAACAAGTCATC      |
| TNF-232R                   | GGGCTACAGGCTTGTCACTT           |
| <b>Probe Name</b>          | <b>Probe Sequence</b>          |
| IFN-gamma-366M2            | CAGTTACCGAATAATTG              |
| IL-2-207M2                 | CTGTGGCCTTCTTG                 |
| IL-4-360M2                 | AGGAGTTCAAGCCC                 |
| IL-6-210M1                 | CCTGAGAAAGGAGACATG             |
| IL-1-47M2                  | ACTACAGCGGCAACGAG              |
| TNF-232M2                  | CAGGCAGTCAGATCAT               |

Forward and reverse primers and probes were designed for real-time quantitative TaqMan RT-PCR of six cytokine genes.

**TABLE S3** ELISA Kits

| <b>Cytokine</b> | <b>Company</b> | <b>Kit</b>                     | <b>Catalog Number</b> |
|-----------------|----------------|--------------------------------|-----------------------|
| IFN- $\gamma$   | R&D            | Quantikine human IFN- $\gamma$ | DIF50                 |
| IL-2            | R&D            | Quantikine human IL-2          | D2050                 |
| IL-4            | BD PharMingen  | Opt EIA human IL-4             | 550614                |
| IL-6            | R&D            | Quantikine human IL-6          | D6050                 |
| IL-1 $\beta$    | R&D            | Quantikine human IL-1 $\beta$  | DLB50                 |
| TNF- $\alpha$   | BD PharMingen  | Opt EIA human TNF- $\alpha$    | 550610                |

Six ELISA kits were used for detecting six cytokine proteins.

**TABLE S4 Missing rates (%) for variables**

| Assay type                 | Variable  | Target                                         | Time Points (Months)                     |       |       |       |        |
|----------------------------|-----------|------------------------------------------------|------------------------------------------|-------|-------|-------|--------|
|                            | Name      |                                                | 1                                        | 2     | 6     | 7     | 'Last' |
| ELISA                      | IgG       | Anti-PA IgG protein                            | 0.73                                     | 1.46  | 0     | 0     | 0      |
|                            | IL1Be     | IL-1 $\beta$ protein                           | 27.74                                    | 10.22 | 64.23 | 13.14 | NA     |
|                            | IL2e      | IL-2 protein                                   | 27.01                                    | 2.19  | 57.66 | 9.49  | NA     |
|                            | IL4e      | IL-4 protein                                   | 27.74                                    | 2.19  | 60.58 | 9.49  | NA     |
|                            | IL6e      | IL-6 protein                                   | 27.01                                    | 41.61 | 58.39 | 9.49  | NA     |
|                            | IFNe      | IFN- $\gamma$ protein                          | 28.47                                    | 2.19  | 60.58 | 9.49  | NA     |
|                            | TNFe      | TNF- $\alpha$ protein                          | 28.47                                    | 3.65  | 58.39 | 9.49  | NA     |
|                            | R_IL4IFNe | Ratio of IL-4 protein to IFN- $\gamma$ protein | 29.20                                    | 2.19  | 63.50 | 9.49  | NA     |
| RT-PCR                     | IL1Bm     | IL-1 $\beta$ mRNA                              | 1.46                                     | 3.65  | 10.95 | 1.46  | NA     |
|                            | IL2m      | IL-2 mRNA                                      | 1.46                                     | 3.65  | 10.95 | 1.46  | NA     |
|                            | IL4m      | IL-4 mRNA                                      | 1.46                                     | 3.65  | 10.95 | 1.46  | NA     |
|                            | IL6m      | IL-6 mRNA                                      | 1.46                                     | 3.65  | 10.95 | 1.46  | NA     |
|                            | IFNm      | IFN- $\gamma$ mRNA                             | 1.46                                     | 3.65  | 10.95 | 1.46  | NA     |
|                            | TNFm      | TNF- $\alpha$ mRNA                             | 1.46                                     | 3.65  | 10.95 | 1.46  | NA     |
|                            |           | R_IL4IFNm                                      | Ratio of IL-4 mRNA to IFN- $\gamma$ mRNA | 1.46  | 3.65  | 10.95 | 1.46   |
| Toxin neutralization assay | TNA       | Toxin Neutralization Activity ED50             | 0.73                                     | 1.46  | 0     | 0     | 0      |
| Lymphocyte stimulation     | SI        | Lymphocyte Stimulation Index                   | 2.92                                     | 2.19  | 51.82 | 0.73  | 33.58  |

---

assay

---

|               |             |                                                                                           |       |       |       |       |       |
|---------------|-------------|-------------------------------------------------------------------------------------------|-------|-------|-------|-------|-------|
| Avidity assay | AI          | Anti-PA IgG avidity                                                                       | 61.31 | 23.36 | 77.37 | 18.24 | NA    |
| ELISpot       | INFeli      | Frequency of IFN- $\gamma$ -secreting cells                                               | 54.01 | 53.28 | 13.14 | 21.17 | 9.49  |
|               | IL4eli      | Frequency of IL-4-secreting cells                                                         | 59.12 | 51.09 | 8.76  | 17.52 | 35.77 |
|               | R_IL4IFNeli | Ratio of frequency of IL-4-secreting cells to frequency of IFN- $\gamma$ -secreting cells | 70.07 | 57.66 | 13.14 | 29.93 | 35.77 |

---

NA not available.

**TABLE S5** Imputations at each time point

|            | Imputation 1 | Imputation 2 | Imputation 3 |
|------------|--------------|--------------|--------------|
| Variables  | Survival     | Survival     | survival     |
| used for   | control      | control      | control      |
| imputation | IgG          | IgG          | IgG          |
|            | TNA          | TNA          | TNA          |
|            | IFNm         | IFNeli       | R_IL4IFNeli  |
|            | IL-1Bm       | IL1Be        | R_IL4IFNm    |
|            | IL2m         | IL2e         | R_IL4IFNe    |
|            | IL4m         | IL4e         | SI           |
|            | IL6m         | IL4eli       | AI           |
|            | TNFm         | IL6e         |              |
|            | SI           | TNFe         |              |
|            | AI           | SI           |              |
|            |              | AI           |              |
| Variables  | IgG          | IFNeli       | R_IL4IFNeli  |
| kept after | TNA          | IL1Be        | R_IL4IFNm    |
| imputation | IFNm         | IL2e         | R_IL4IFNe    |
|            | IL1Bm        | IL4e         |              |
|            | IL2m         | IL4eli       |              |
|            | IL4m         | IL6e         |              |
|            | IL6m         | TNFe         |              |
|            | TNFm         |              |              |
|            | SI           |              |              |
|            | AI           |              |              |

Three sets of imputations were performed at each time point. In each set of imputation, variables were included if there was no multicollinearity present. Some variables were used in more than one set (e.g. TNA), and these variables were retained for analysis from only 1 imputed set.

**TABLE S6** Introduction of variable selection software packages

| <b>Variable Selection Software Packages</b>    |                                                   |                                                       |                                   |                                                   |
|------------------------------------------------|---------------------------------------------------|-------------------------------------------------------|-----------------------------------|---------------------------------------------------|
|                                                | <b>BBR</b>                                        | <b>Elasticnet</b>                                     | <b>Glmnet</b>                     | <b>Pensim</b>                                     |
| <b>Language</b>                                | C++                                               | R                                                     | R                                 | R                                                 |
| <b>Optimization algorithm</b>                  | Imposes Laplace priors, cyclic coordinate descent | Least angle regression (LARS)                         | Cyclic coordinate descent         | Combination of gradient ascent and Newton-Raphson |
| <b>Criterion for tuning penalty parameters</b> | Maximum cross-validated log-likelihood            | Minimum cross-validated mean squared prediction error | Minimum deviance                  | Maximum cross-validated log-likelihood            |
| <b>Penalty parameter tuning in elastic net</b> | NA                                                | Successive one-dimensional tuning                     | Successive one-dimensional tuning | Two-dimensional tuning                            |

Four software packages were used for variable selections, with different languages, optimization algorithms, criteria for tuning penalty parameters and penalty parameter tuning in elastic net. NA, not applicable due to the absence of elastic net variable selection in BBR.

**Table S7** Summary of optimal variable selections

| Variable           | Time    | Simple logistic regression |                      |                           | BBR   | Elasticnet |     | Pensim  |     | Glmnet  |     |
|--------------------|---------|----------------------------|----------------------|---------------------------|-------|------------|-----|---------|-----|---------|-----|
|                    | Point   | Intercept                  | Parameter            | AUC                       |       | elastic    |     | elastic |     | elastic |     |
|                    | (month) | (p value)                  | (P value)            | (95% CI)                  | LASSO | LASSO      | net | LASSO   | net | LASSO   | net |
| <b>IgG</b>         | 6       | 0.8952<br>(<0.0001)        | 1.7332<br>(<0.0001)* | 0.7724<br>(0.6956-0.8491) | x     |            | x   |         |     |         | x   |
|                    | 7       | -0.6569<br>(0.0582)        | 1.0009<br>(<0.0001)* | 0.7956<br>(0.7208-0.8703) |       | x          | x   | x       | x   |         | x   |
|                    | last    | 0.7105<br>(0.0015)         | 2.1628<br>(<0.0001)* | 0.8214<br>(0.7514-0.8914) | √     | √          | √   | √       | √   | √       | √   |
| <b>TNA</b>         | 6       | -1.346<br>(0.0060)         | 1.8551<br>(<0.0001)* | 0.7416<br>(0.6689-0.8143) | x     |            | x   | x       | x   | x       | x   |
|                    | 7       | -1.9889<br>(0.0006)        | 1.0808<br>(<0.0001)* | 0.7918<br>(0.7158-0.8678) |       | x          | x   | x       | x   | x       | x   |
| <b>SI</b>          | 2       | -4.9416<br>(<0.0001)       | 1.4900<br>(<0.0001)* | 0.7860<br>(0.7086-0.8633) | √     | √          | √   | √       | √   | √       | √   |
|                    | 6       | -3.9370<br>(0.0376)        | 1.4369<br>(0.0111)*  | 0.7095<br>(0.5809-0.8381) | √     | √          | √   | √       | √   | √       | √   |
| <b>IL4eli</b>      | 1       | 0.7150<br>(0.1233)         | 0.3953<br>(0.2996)   | 0.5961<br>(0.4467-0.7455) |       |            |     | x       | x   |         | x   |
|                    | 7       | 0.4176<br>(0.2114)         | 0.2921<br>(0.1621)   | 0.5804<br>(0.4643-0.6965) |       |            |     | x       | x   | x       | x   |
|                    | last    | 0.6154<br>(0.2330)         | 0.0560<br>(0.8384)   | 0.4842<br>(0.3407-0.6277) | √     | √          | √   | √       | √   | √       | √   |
| <b>IFNeli</b>      | 6       | -0.3719<br>(0.3090)        | 0.7881<br>(0.0004)*  | 0.7073<br>(0.6077-0.8068) |       | x          | x   | x       | x   |         | x   |
| <b>R_IL4IFNeli</b> | 6       | 0.6981<br>(0.0007)         | -0.1751<br>(0.3884)  | 0.5414<br>(0.4256-0.6573) |       |            |     | x       | x   | x       | x   |
|                    | 7       | 0.6808<br>(0.0020)         | -0.1508<br>(0.3684)  | 0.5428<br>(0.4195-0.6661) |       | x          | x   | x       | x   | x       | x   |
|                    | last    | 0.7042<br>(0.0019)         | -0.0990<br>(0.6792)  | 0.5640<br>(0.4374-0.6906) |       |            |     | x       | x   |         | x   |
| <b>IL1Be</b>       | 2       | -2.2035<br>(0.5649)        | 1.3679<br>(0.4383)   | 0.5107<br>(0.4636-0.5578) |       |            |     | x       | x   |         |     |



|                                |   |                      |                      |                           |                      |                             |                               |                         |                           |                         |                           |
|--------------------------------|---|----------------------|----------------------|---------------------------|----------------------|-----------------------------|-------------------------------|-------------------------|---------------------------|-------------------------|---------------------------|
|                                | 6 | -2.4384<br>(0.4219)  | 1.3598<br>(0.3364)   | 0.5395<br>(0.4105-0.6684) |                      |                             |                               | x                       | x                         |                         |                           |
| <b>IL1Bm</b>                   | 7 | -0.7914<br>(0.4133)  | 0.5420<br>(0.1135)   | 0.5930<br>(0.4937-0.6923) |                      |                             |                               | x                       | x                         | x                       | x                         |
| <b>IL4e</b>                    | 1 | -2.0654<br>(0.5856)  | 2.0972<br>(0.4594)   | 0.5149<br>(0.4790-0.5508) | √                    | √                           | √                             | √                       | √                         | √                       | √                         |
| <b>IL6e</b>                    | 2 | -2.4945<br>(0.2042)  | 1.5251<br>(0.0701)   | 0.6359<br>(0.5203-0.7515) |                      |                             |                               |                         | x                         |                         |                           |
| <b>TNFe</b>                    | 1 | 3.2168<br>(0.0787)   | -1.4247<br>(0.1622)  | 0.6627<br>(0.5485-0.7769) | √                    | √                           | √                             | √                       | √                         | √                       | √                         |
|                                | 6 | -21.8363<br>(0.9858) | 13.1804<br>(0.9856)  | 0.5208<br>(0.4800-0.5617) | √                    | √                           | √                             | √                       | √                         | √                       | √                         |
| <b>R_IL4IFNm</b>               | 6 | 0.0685<br>(0.8324)   | -2.1127<br>(0.0296)* | 0.5818<br>(0.4750-0.6885) |                      |                             |                               | x                       | x                         | x                       | x                         |
|                                | 7 | 0.6608<br>(0.0004)   | -0.7249<br>(0.0508)  | 0.5829<br>(0.4844-0.6815) |                      |                             | x                             | x                       | x                         | x                       | x                         |
| <b>Number of Variables</b>     |   |                      |                      |                           | 9                    | 12                          | 14                            | 21                      | 22                        | 15                      | 20                        |
| <b>Variable Set Identifier</b> |   |                      |                      |                           | <b>Opt_LASSO_BBR</b> | <b>Opt_LASSO_Elasticnet</b> | <b>Opt_Elastic_Elasticnet</b> | <b>Opt_LASSO_Pensim</b> | <b>Opt_Elastic_Pensim</b> | <b>Opt_LASSO_Glmnet</b> | <b>Opt_Elastic_Glmnet</b> |

Optimal variable selections were performed with 7 selection methods. \* p value < 0.05 from Wald Chi-Square test of the parameter estimate; √ Variables that were selected by all the optimal selection methods.

**TABLE S8** Variables selected by BBR

| Parsimonious |      |           |       | Optimal     |      |           |       |
|--------------|------|-----------|-------|-------------|------|-----------|-------|
| Variable     | Rank | Frequency | Score | Variable    | Rank | Frequency | Score |
| IgG_Last     | 1626 | 20        | 32520 | IgG_Last    | 1625 | 20        | 32500 |
| SI_2         | 1447 | 18        | 26046 | SI_2        | 1447 | 18        | 26046 |
| SI_6         | 1062 | 14        | 14868 | SI_6        | 1060 | 14        | 14840 |
|              |      |           |       | TNFe_6      | 777  | 10        | 7770  |
|              |      |           |       | IL4e_1      | 776  | 10        | 7760  |
|              |      |           |       | TNA_6       | 764  | 10        | 7640  |
|              |      |           |       | IL4eLi_7    | 563  | 10        | 5630  |
|              |      |           |       | TNFe_1      | 532  | 10        | 5320  |
|              |      |           |       | IL4eLi_Last | 521  | 10        | 5210  |

Variables were selected by LASSO with C++ package BBR. Parsimonious: Parsimonious variable set. Optimal: Optimal variable set. The selected variables were ordered from high to low by ordering the regression coefficients from high to low, and were then assigned numbers in descending order from 82 with a difference of 1 between neighboring variables. Rank was obtained by adding these assigned numbers across the imputed data sets where the variable was selected. Frequency indicates the number of times each variable was selected out of the 20 imputed data sets. Score is the product between rank and frequency.

**TABLE S9** Parsimonious sets of variables selected by LASSO and elastic net with Elasticnet package

| LASSO    |      |           |       | elastic net |      |           |       |
|----------|------|-----------|-------|-------------|------|-----------|-------|
| Variable | Rank | Frequency | Score | Variable    | Rank | Frequency | Score |
| IgG_Last | 1640 | 20        | 32800 | IgG_Last    | 1640 | 20        | 32800 |
| SI_2     | 1117 | 14        | 15638 | SI_2        | 1500 | 19        | 28500 |
| SI_6     | 955  | 12        | 11460 | IgG_7       | 1436 | 18        | 25848 |
|          |      |           |       | SI_6        | 875  | 11        | 9625  |
|          |      |           |       | TNA_7       | 789  | 10        | 7890  |

Parsimonious variables were selected by LASSO or elastic net with the Elasticnet package. The selected variables were ordered from high to low by ordering the regression coefficients from high to low, and were then assigned numbers in descending order from 82 with a difference of 1 between neighboring variables. Rank was obtained by adding these assigned numbers across the imputed data sets where the variable was selected. Frequency indicates the number of times each variable was selected out of the 20 imputed data sets. Score is the product between rank and frequency.

**TABLE S10** Optimal sets of variables selected by LASSO and elastic net with Elasticnet package

| LASSO         |      |           |       | elastic net   |      |           |       |
|---------------|------|-----------|-------|---------------|------|-----------|-------|
| Variable      | Rank | Frequency | Score | Variable      | Rank | Frequency | Score |
| IgG_Last      | 1631 | 20        | 32620 | IgG_Last      | 1629 | 20        | 32580 |
| SI_2          | 1596 | 20        | 31920 | SI_2          | 1587 | 20        | 31740 |
| TNFe_1        | 1132 | 17        | 19244 | IgG_7         | 1490 | 19        | 28310 |
| IgG_7         | 1251 | 16        | 20016 | TNA_7         | 1485 | 19        | 28215 |
| SI_6          | 1150 | 15        | 17250 | IgG_6         | 1134 | 15        | 17010 |
| IL4eli_Last   | 890  | 14        | 12460 | SI_6          | 1062 | 14        | 14868 |
| TNA_7         | 1012 | 13        | 13156 | IL4e_1        | 1001 | 13        | 13013 |
| IL4e_1        | 1007 | 13        | 13091 | TNA_6         | 963  | 13        | 12519 |
| R_IL4IFNeli_7 | 872  | 13        | 11336 | R_IL4IFNm_7   | 812  | 13        | 10556 |
| R_IL4IFNm_7   | 867  | 13        | 11271 | TNFe_1        | 769  | 13        | 9997  |
| TNFe_6        | 876  | 11        | 9636  | IL4eli_Last   | 758  | 13        | 9854  |
| IFNeli_6      | 762  | 10        | 7620  | TNFe_6        | 949  | 12        | 11388 |
|               |      |           |       | R_IL4IFNeli_7 | 614  | 10        | 6140  |
|               |      |           |       | IL4eli_7      | 595  | 10        | 5950  |

Optimal variables were selected by LASSO or elastic net with the Elasticnet package. The selected variables were ordered from high to low by ordering the regression coefficients from high to low, and were then assigned numbers in descending order from 82 with a difference of 1 between neighboring variables. Rank was obtained by adding these assigned numbers across the imputed data sets where the variable was selected. Frequency indicates the number of times each variable was selected out of the 20 imputed data sets. Score is the product between rank and frequency.

**TABLE S11** Optimal sets of variables selected by LASSO and elastic net with Pensim package

| LASSO            |      |           |       | elastic net      |      |           |       |
|------------------|------|-----------|-------|------------------|------|-----------|-------|
| Variable         | Rank | Frequency | Score | Variable         | Rank | Frequency | Score |
| IgG_Last         | 1625 | 20        | 32500 | IgG_Last         | 1626 | 20        | 32520 |
| SI_2             | 1598 | 20        | 31960 | SI_2             | 1600 | 20        | 32000 |
| IL4eLi_Last      | 1200 | 20        | 24000 | IL4e_1           | 1537 | 20        | 30740 |
| IL4e_1           | 1469 | 19        | 27911 | TNA_6            | 1521 | 20        | 30420 |
| TNA_6            | 1449 | 19        | 27531 | IL4eLi_Last      | 1119 | 20        | 22380 |
| R_IL4IFNm_7      | 1199 | 19        | 22781 | TNA_7            | 1443 | 19        | 27417 |
| TNFe_1           | 1148 | 19        | 21812 | R_IL4IFNm_7      | 1113 | 19        | 21147 |
| SI_6             | 1354 | 18        | 24372 | SI_6             | 1347 | 18        | 24246 |
| IL4eLi_7         | 1141 | 18        | 20538 | IL1Bm_7          | 1055 | 18        | 18990 |
| IL1Bm_7          | 1071 | 17        | 18207 | IL4eLi_7         | 1048 | 18        | 18864 |
| R_IL4IFNeLi_7    | 1010 | 16        | 16160 | TNFe_1           | 991  | 18        | 17838 |
| TNFe_6           | 1182 | 15        | 17730 | IgG_7            | 1250 | 17        | 21250 |
| TNA_7            | 1166 | 15        | 17490 | R_IL4IFNeLi_7    | 1008 | 17        | 17136 |
| IL4eLi_1         | 873  | 13        | 11349 | TNFe_6           | 1183 | 15        | 17745 |
| R_IL4IFNm_6      | 858  | 13        | 11154 | R_IL4IFNm_6      | 878  | 14        | 12292 |
| R_IL4IFNeLi_6    | 838  | 13        | 10894 | R_IL4IFNeLi_6    | 780  | 13        | 10140 |
| IL1Be_2          | 773  | 12        | 9276  | IL4eLi_1         | 785  | 12        | 9420  |
| R_IL4IFNeLi_Last | 793  | 11        | 8723  | IL1Be_6          | 719  | 12        | 8628  |
| IL1Be_6          | 700  | 11        | 7700  | R_IL4IFNeLi_Last | 752  | 11        | 8272  |
| IFNeLi_6         | 744  | 10        | 7440  | IL1Be_2          | 627  | 11        | 6897  |
| IgG_7            | 729  | 10        | 7290  | IL6e_2           | 733  | 10        | 7330  |
|                  |      |           |       | IFNeLi_6         | 724  | 10        | 7240  |

Optimal variables were selected by LASSO or elastic net with the Pensim package. The selected variables were ordered from high to low by ordering the regression coefficients from high to low, and were then assigned numbers in descending order from 82 with a difference of 1 between neighboring variables. Rank was obtained by adding these assigned numbers across the imputed data sets where the variable was selected. Frequency indicates the number of times each variable was selected out of the 20 imputed data sets. Score is the product between rank and frequency.

**TABLE S12** Parsimonious sets of variables selected by LASSO and elastic net with Glmnet package

| LASSO    |      |           |       | elastic net   |      |           |       |
|----------|------|-----------|-------|---------------|------|-----------|-------|
| Variable | Rank | Frequency | Score | Variable      | Rank | Frequency | Score |
| IgG_Last | 1628 | 20        | 32560 | IgG_Last      | 1639 | 20        | 32780 |
| SI_2     | 1358 | 17        | 23086 | SI_2          | 1515 | 19        | 28785 |
| SI_6     | 799  | 10        | 7990  | IgG_6         | 1471 | 19        | 27949 |
|          |      |           |       | IgG_7         | 1406 | 18        | 25308 |
|          |      |           |       | TNA_7         | 1395 | 18        | 25110 |
|          |      |           |       | R_IL4IFNm_7   | 1164 | 17        | 19788 |
|          |      |           |       | SI_6          | 1247 | 16        | 19952 |
|          |      |           |       | TNA_6         | 1126 | 15        | 16890 |
|          |      |           |       | IFNeli_6      | 902  | 12        | 10824 |
|          |      |           |       | R_IL4IFNeli_7 | 808  | 12        | 9696  |
|          |      |           |       | TNFe_1        | 794  | 12        | 9528  |
|          |      |           |       | IL4e_1        | 737  | 10        | 7370  |

Parsimonious variables were selected by LASSO or elastic net with the Glmnet package. The selected variables were ordered from high to low by ordering the regression coefficients from high to low, and were then assigned numbers in descending order from 82 with a difference of 1 between neighboring variables. Rank was obtained by adding these assigned numbers across the imputed data sets where the variable was selected. Frequency indicates the number of times each variable was selected out of the 20 imputed data sets. Score is the product between rank and frequency.

**TABLE S13** Optimal sets of variables selected by LASSO and elastic net with Glmnet package

| LASSO         |      |           |       | elastic net      |      |           |       |
|---------------|------|-----------|-------|------------------|------|-----------|-------|
| Variable      | Rank | Frequency | Score | Variable         | Rank | Frequency | Score |
| IgG_Last      | 1624 | 20        | 32480 | IgG_Last         | 1602 | 20        | 32040 |
| SI_2          | 1596 | 20        | 31920 | SI_2             | 1592 | 20        | 31840 |
| R_IL4IFNm_7   | 1366 | 20        | 27320 | IL4E_1           | 1544 | 20        | 30880 |
| IL4e_1        | 1405 | 18        | 25290 | TNA_7            | 1538 | 20        | 30760 |
| TNA_6         | 1371 | 18        | 24678 | TNA_6            | 1497 | 20        | 29940 |
| SI_6          | 1299 | 17        | 22083 | R_IL4IFNm_7      | 1160 | 20        | 23200 |
| TNA_7         | 1297 | 17        | 22049 | IL4eLi_Last      | 1159 | 20        | 23180 |
| TNFe_1        | 1125 | 17        | 19125 | SI_6             | 1352 | 18        | 24336 |
| IL4eLi_Last   | 1109 | 17        | 18853 | IL1Bm_7          | 1086 | 18        | 19548 |
| R_IL4IFNeLi_7 | 951  | 14        | 13314 | R_IL4IFNeLi_7    | 1067 | 18        | 19206 |
| TNFe_6        | 939  | 12        | 11268 | TNFe_1           | 1016 | 18        | 18288 |
| IL1Bm_7       | 745  | 11        | 8195  | IgG_7            | 1272 | 17        | 21624 |
| IL4eLi_7      | 722  | 11        | 7942  | IL4eLi_7         | 993  | 17        | 16881 |
| R_IL4IFNm_6   | 692  | 10        | 6920  | TNFe_6           | 1245 | 16        | 19920 |
| R_IL4IFNeLi_6 | 686  | 10        | 6860  | IgG_6            | 1163 | 16        | 18608 |
|               |      |           |       | R_IL4IFNm_6      | 865  | 14        | 12110 |
|               |      |           |       | R_IL4IFNeLi_6    | 801  | 13        | 10413 |
|               |      |           |       | IFNeLi_6         | 854  | 12        | 10248 |
|               |      |           |       | IL4eLi_1         | 717  | 11        | 7887  |
|               |      |           |       | R_IL4IFNeLi_Last | 647  | 10        | 6470  |

Optimal variables were selected by LASSO or elastic net with the Glmnet package. The selected variables were ordered from high to low by ordering the regression coefficients from high to low, and



were then assigned numbers in descending order from 82 with a difference of 1 between neighboring variables. Rank was obtained by adding these assigned numbers across the imputed data sets where the variable was selected. Frequency indicates the number of times each variable was selected out of the 20 imputed data sets. Score is the product between rank and frequency.

**TABLE S14** Comparing performance of regression models

| Model<br>Data Set | 'Last' anti-PA IgG, SI_2 |               |                 | Par_LASSO |               |         | Par_Elastic_Elasticnet |               |         | Par_Elastic_Glmnet |               |         |
|-------------------|--------------------------|---------------|-----------------|-----------|---------------|---------|------------------------|---------------|---------|--------------------|---------------|---------|
|                   | AUC                      | CI            | p value         | AUC       | CI            | p value | AUC                    | CI            | p value | AUC                | CI            | p value |
| 1                 | 0.8419                   | 0.7762-0.9075 | Reference Model | 0.8529    | 0.7883-0.9175 | 0.5185  | 0.8529                 | 0.7890-0.9167 | 0.5175  | 0.8981             | 0.8426-0.9536 | 0.0050  |
| 2                 | 0.8375                   | 0.7705-0.9045 | Reference Model | 0.8419    | 0.7762-0.9076 | 0.9630  | 0.8412                 | 0.7753-0.9070 | 0.8925  | 0.9186             | 0.8724-0.9648 | 0.0040  |
| 3                 | 0.8382                   | 0.7715-0.9050 | Reference Model | 0.8424    | 0.7775-0.9073 | 0.8830  | 0.8429                 | 0.7782-0.9075 | 0.8755  | 0.8988             | 0.8475-0.9502 | 0.0155  |
| 4                 | 0.8434                   | 0.7783-0.9084 | Reference Model | 0.8458    | 0.7806-0.9110 | 0.8670  | 0.8456                 | 0.7802-0.9109 | 0.5585  | 0.8913             | 0.8379-0.9446 | 0.0620  |
| 5                 | 0.8448                   | 0.7800-0.9097 | Reference Model | 0.8460    | 0.7813-0.9108 | 0.5500  | 0.8441                 | 0.7789-0.9093 | 0.7590  | 0.8908             | 0.8346-0.9469 | 0.0335  |
| 6                 | 0.8394                   | 0.7730-0.9059 | Reference Model | 0.8473    | 0.7825-0.9120 | 0.9715  | 0.8460                 | 0.7810-0.9111 | 0.9650  | 0.9179             | 0.8671-0.9687 | 0.0030  |
| 7                 | 0.8404                   | 0.7742-0.9067 | Reference Model | 0.8438    | 0.7783-0.9094 | 0.7965  | 0.8453                 | 0.7800-0.9106 | 0.7945  | 0.9062             | 0.8544-0.9580 | 0.0080  |
| 8                 | 0.8409                   | 0.7748-0.9070 | Reference Model | 0.8495    | 0.7861-0.9128 | 0.7690  | 0.8514                 | 0.7890-0.9139 | 0.8150  | 0.9128             | 0.8637-0.9618 | 0.0055  |
| 9                 | 0.8380                   | 0.7711-0.9048 | Reference Model | 0.8514    | 0.7874-0.9155 | 0.5675  | 0.8522                 | 0.7884-0.9159 | 0.5170  | 0.8876             | 0.8300-0.9451 | 0.0120  |
| 10                | 0.8416                   | 0.7759-0.9074 | Reference Model | 0.8436    | 0.7781-0.9091 | 0.6165  | 0.8451                 | 0.7798-0.9103 | 0.6730  | 0.9137             | 0.8686-0.9589 | 0.0095  |
| 11                | 0.8424                   | 0.7768-0.9080 | Reference Model | 0.8414    | 0.7756-0.9072 | 0.2700  | 0.8394                 | 0.7730-0.9058 | 0.8885  | 0.8768             | 0.8188-0.9349 | 0.0755  |
| 12                | 0.8436                   | 0.7785-0.9087 | Reference Model | 0.8443    | 0.7793-0.9094 | 0.9220  | 0.8456                 | 0.7808-0.9103 | 0.8520  | 0.8893             | 0.8336-0.9450 | 0.0375  |
| 13                | 0.8382                   | 0.7715-0.9050 | Reference Model | 0.8680    | 0.8052-0.9309 | 0.0345  | 0.8688                 | 0.8063-0.9312 | 0.0410  | 0.9052             | 0.8505-0.9599 | 0.0020* |
| 14                | 0.8392                   | 0.7727-0.9057 | Reference Model | 0.8497    | 0.7862-0.9132 | 0.9115  | 0.8495                 | 0.7859-0.9130 | 0.9540  | 0.8991             | 0.8456-0.9525 | 0.0180  |
| 15                | 0.8419                   | 0.7761-0.9077 | Reference Model | 0.8524    | 0.7899-0.9149 | 0.5615  | 0.8517                 | 0.7890-0.9143 | 0.6730  | 0.9152             | 0.8688-0.9616 | 0.0100  |
| 16                | 0.8385                   | 0.7717-0.9052 | Reference Model | 0.8509    | 0.7878-0.9140 | 0.7515  | 0.8539                 | 0.7916-0.9161 | 0.7895  | 0.8976             | 0.8417-0.9535 | 0.0075  |
| 17                | 0.8419                   | 0.7762-0.9075 | Reference Model | 0.8460    | 0.7815-0.9106 | 0.3655  | 0.8456                 | 0.7809-0.9102 | 0.6020  | 0.9079             | 0.8600-0.9557 | 0.0110  |
| 18                | 0.8436                   | 0.7786-0.9086 | Reference Model | 0.8529    | 0.7897-0.9161 | 0.4330  | 0.8500                 | 0.7858-0.9141 | 0.5885  | 0.9069             | 0.8590-0.9548 | 0.0185  |
| 19                | 0.8421                   | 0.7765-0.9078 | Reference Model | 0.8592    | 0.7985-0.9200 | 0.6695  | 0.8631                 | 0.8030-0.9233 | 0.6640  | 0.9064             | 0.8541-0.9587 | 0.0085  |
| 20                | 0.8399                   | 0.7736-0.9063 | Reference Model | 0.8539    | 0.7908-0.9170 | 0.6600  | 0.8541                 | 0.7912-0.9171 | 0.6165  | 0.9035             | 0.8514-0.9556 | 0.0085  |
| Mean              | 0.8409                   |               | Reference Model | 0.8492    |               | 0.6541  | 0.8494                 |               | 0.7018  | 0.9022             |               | 0.0178  |
| Median            | 0.8413                   |               | Reference Model | 0.8484    |               | 0.6648  | 0.8478                 |               | 0.7160  | 0.9044             |               | 0.0098  |
| Min               | 0.8375                   |               | Reference Model | 0.8414    |               | 0.0345  | 0.8394                 |               | 0.0410  | 0.8768             |               | 0.0020* |
| Max               | 0.8448                   |               | Reference Model | 0.8680    |               | 0.9715  | 0.8688                 |               | 0.9650  | 0.9186             |               | 0.0755  |

The AUCs of logistic regression and PCLR models were compared with that of the logistic regression model with variables 'Last' anti-PA IgG and SI at month 2 by paired permutation tests with the twenty imputed data sets, with a Bonferroni-corrected significance level of 0.0025 for multiple comparisons. \*  $p < 0.0025$ .
